# Supplementary material for: A novel cobalt-anchored covalent organic framework for photocatalytic conversion of CO2 into widely adjustable syngas
Source: Royal Society of Chemistry journal article supplement (doi:10.1039/d2ta02648a), 2022-01-01
Supplement: d2ta02648a1.pdf [file d2ta02648a1.pdf]

## Supporting Information

### **A novel cobalt-anchored covalent organic framework for photocatalytic conversion of CO<sub>2</sub> into widely adjustable syngas**

Jin-Xian Cui,<sup>a</sup> Yao-Mei Fu,<sup>b</sup> Bo Meng,<sup>\*a</sup> Jie Zhou,<sup>\*c</sup> Zi-Yan Zhou,<sup>\*a</sup> Shao-Min Liu<sup>d</sup>  
and Zhong-Min Su<sup>e</sup>

<sup>a</sup> *College of Chemistry and Chemical Engineering, Shandong University of  
Technology, Zibo, 255000 Shandong, China.*

*E-mail: [mb1963@126.com](mailto:mb1963@126.com); [zyzhou@sdut.edu.cn](mailto:zyzhou@sdut.edu.cn)*

<sup>b</sup> *Shandong Engineering Research Center of Green and High-value Marine Fine  
Chemical, Weifang University of Science and Technology, Shouguang, 262700  
Shandong, China.*

<sup>c</sup> *School of Chemistry, South China Normal University, Guangzhou, 510006  
Guangdong, China. E-mail: [20200608@m.scnu.edu.cn](mailto:20200608@m.scnu.edu.cn)*

<sup>d</sup> *College of Chemical Engineering, Beijing University of Chemical Technology,  
Beijing, 100029, China.*

<sup>e</sup> *School of Chemistry and Environmental Engineering, Changchun University of  
Science and Technology, Changchun, 130022 Jilin, China.*

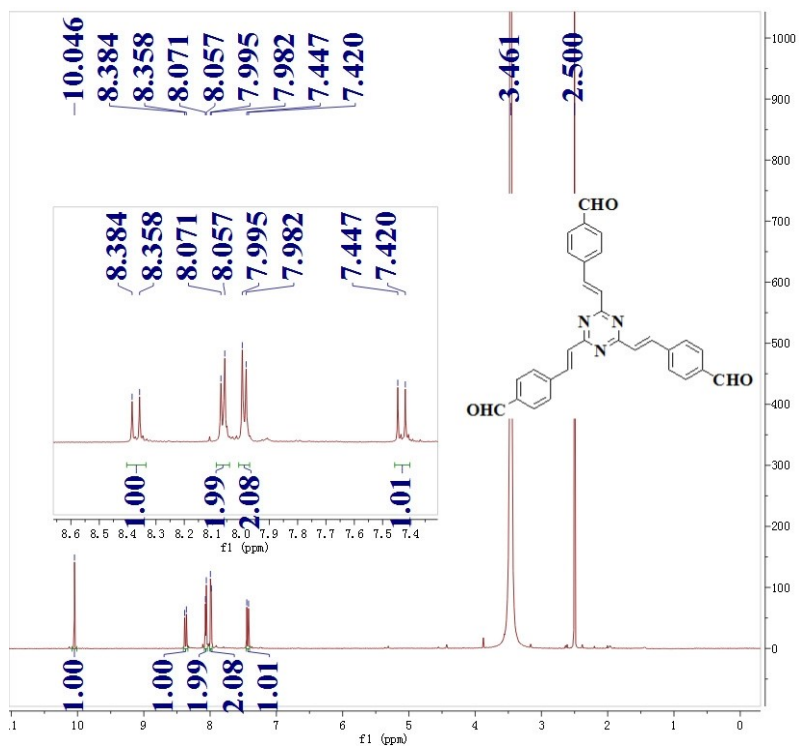

Fig. S1 <sup>1</sup>H NMR spectrum of TVBT.

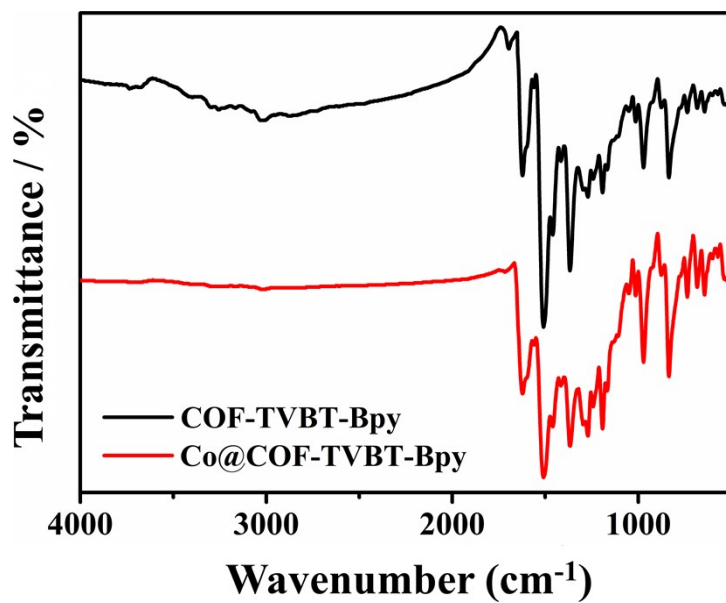

Fig. S2 FT-IR spectra of COF-TVBT-Bpy and Co@COF-TVBT-Bpy.

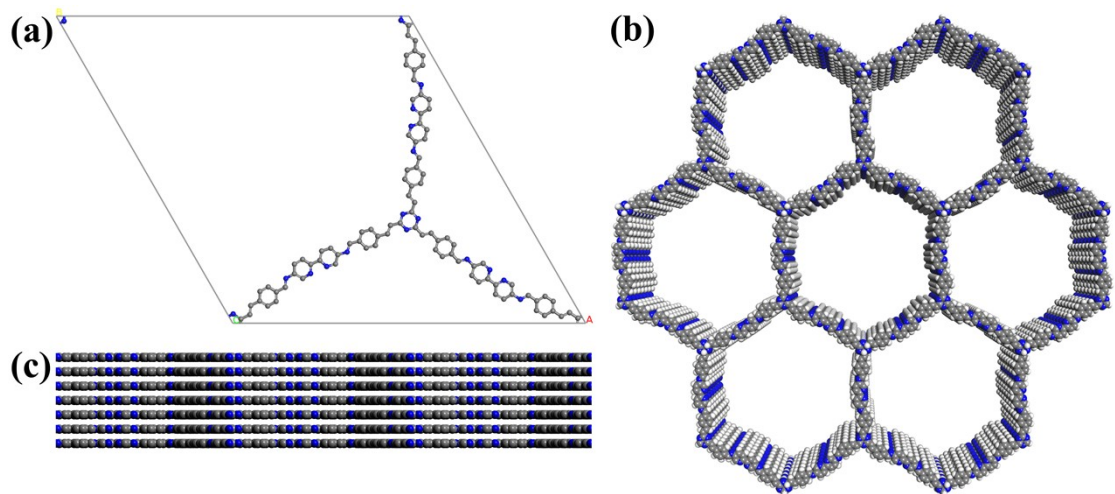

**Fig. S3** AA-stacking modes of COF-TVBT-Bpy (a) Atomic coordinates; (b) Top view; (c) Side view.

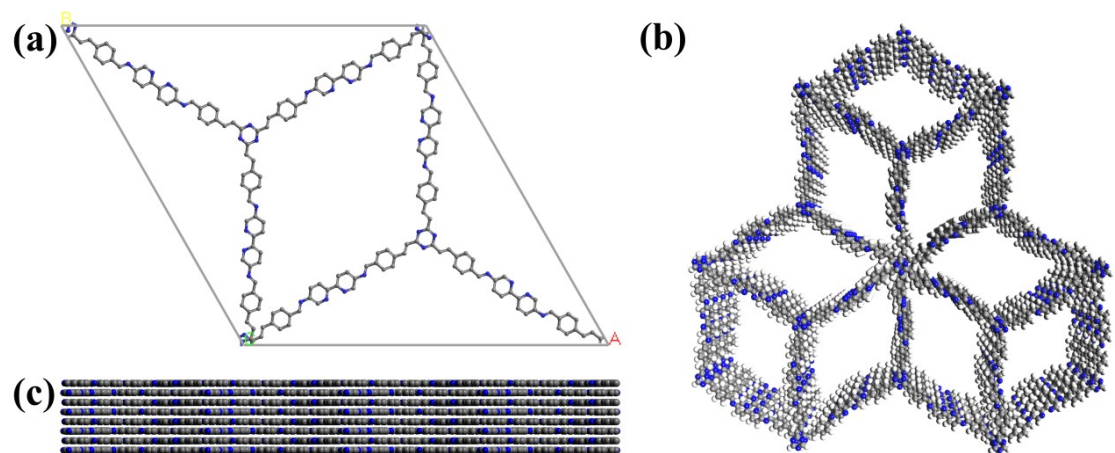

**Fig. S4** AB-stacking modes of COF-TVBT-Bpy (a) Atomic coordinates; (b) Top view; (c) Side view.

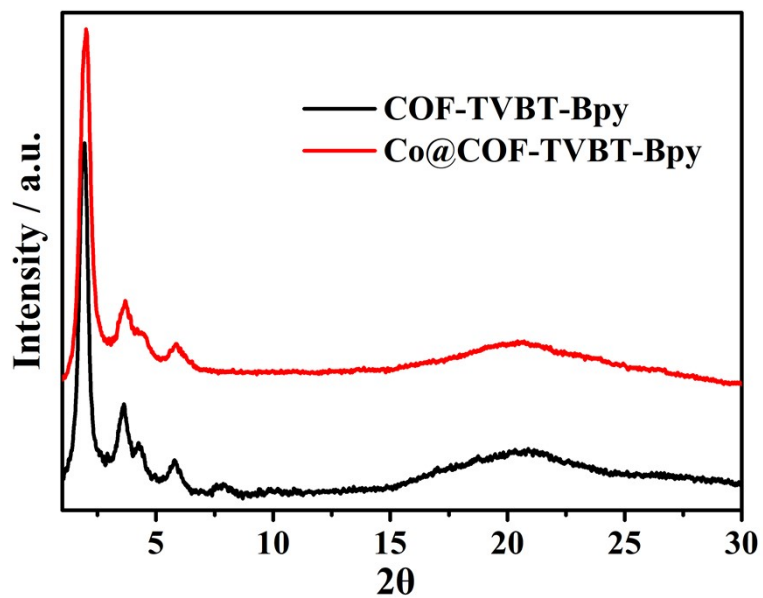

Fig. S5 PXRd patterns of COF-TVBT-Bpy and Co@COF-TVBT-Bpy.

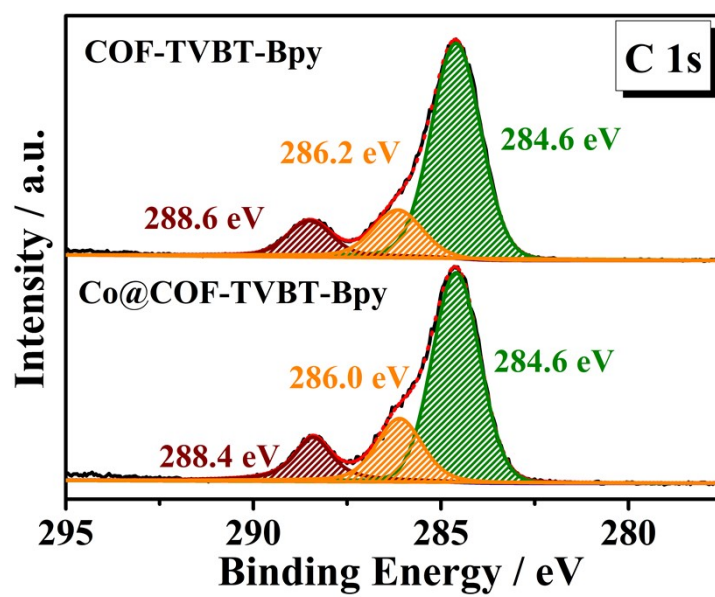

Fig. S6 C 1s XPS spectra of COF-TVBT-Bpy and Co@COF-TVBT-Bpy.

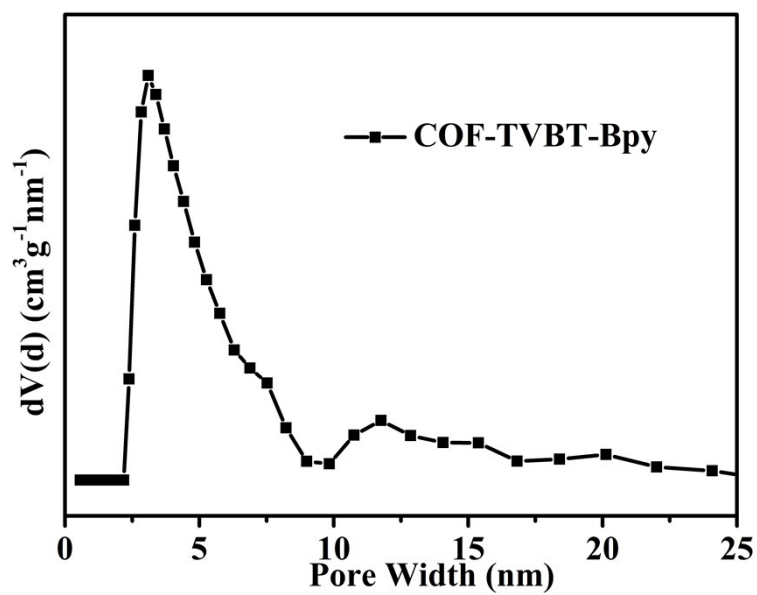

**Fig. S7** The pore sizes of COF-TVBT-Bpy.

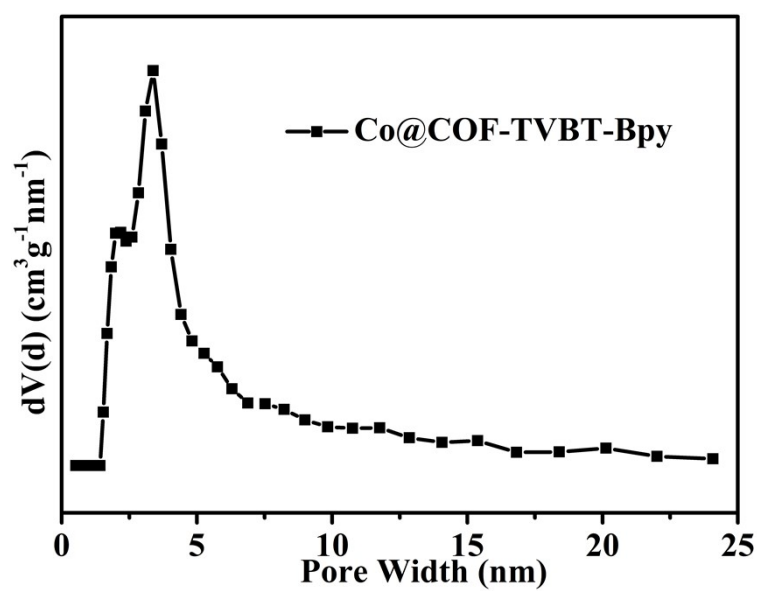

**Fig. S8** The pore sizes of Co@COF-TVBT-Bpy.

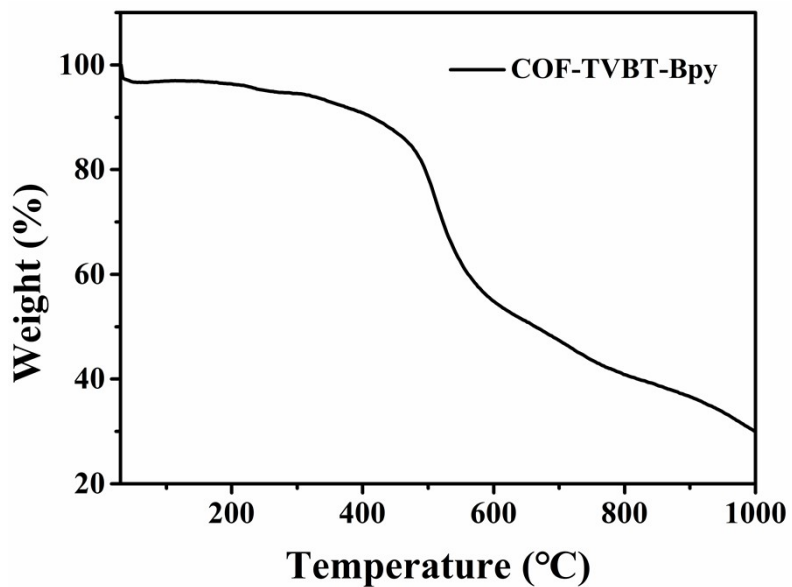

Fig. S9 TGA of COF-TVBT-Bpy.

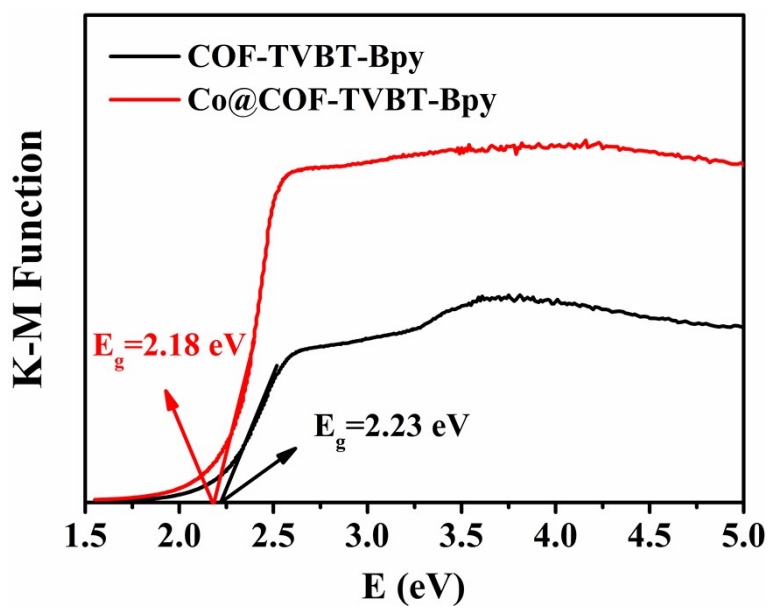

Fig. S10 Kubelka-Munk-transformed reflectance spectra of COF-TVBT-Bpy and Co@COF-TVBT-Bpy.

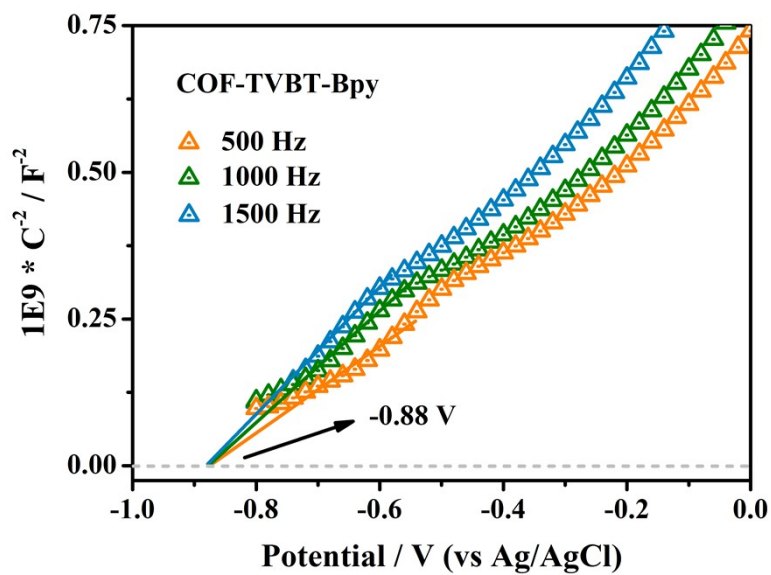

Fig. S11 Mott-Schottky plots of COF-TVBT-Bpy.

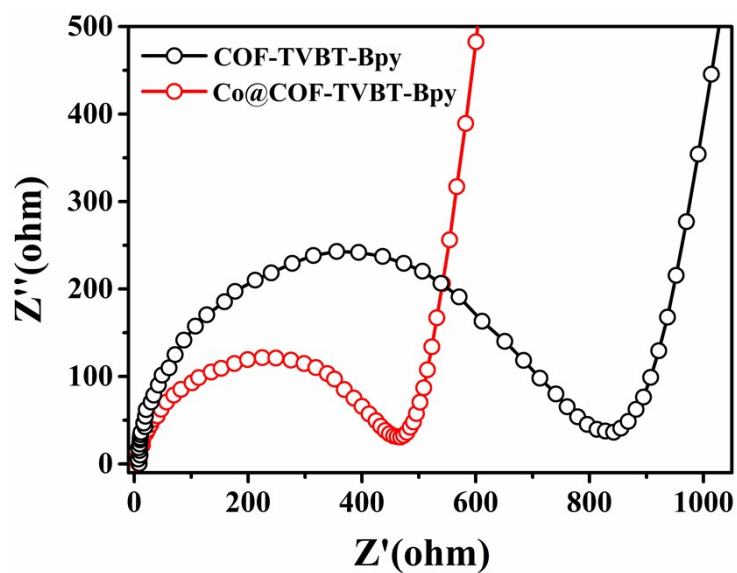

Fig. S12 Nyquist plots of COF-TVBT-Bpy and Co@COF-TVBT-Bpy.

**Table S1** Summary of photocatalytic CO<sub>2</sub> reduction performance of metal-modified COF-based photocatalysts in pure CO<sub>2</sub>.

| Photocatalyst   | Photosensitizer/<br>Sacrificial agent                     | Reaction<br>solvent   | Product yield/<br>$\mu\text{mol}\cdot\text{g}^{-1}\cdot\text{h}^{-1}$ | AQE/<br>% | Ref.         |
|-----------------|-----------------------------------------------------------|-----------------------|-----------------------------------------------------------------------|-----------|--------------|
| Co@COF-TVBT-Bpy | [Ru(bpy) <sub>3</sub> ]Cl <sub>2</sub> /TEOA              | MeCN/H <sub>2</sub> O | CO: 1132.7<br>H <sub>2</sub> : 1158.4                                 | 1.18      | This<br>work |
| Bulk Co-FPy-COF | Dye <sup>a</sup> /TEOA                                    | MeCN/H <sub>2</sub> O | CO: 393<br>H <sub>2</sub> : 113                                       | /         | [S1]         |
| Co-FPy-CON      | Dye <sup>a</sup> /TEOA                                    | MeCN/H <sub>2</sub> O | CO: 1683<br>H <sub>2</sub> : 535                                      | /         | [S1]         |
| Bulk COF367-Co  | [Ru(bpy) <sub>3</sub> ]Cl <sub>2</sub> /<br>Ascorbic acid | KHCO <sub>3</sub>     | CO: 124<br>H <sub>2</sub> : 830                                       | /         | [S2]         |
| COF367-Co NSs   | [Ru(bpy) <sub>3</sub> ]Cl <sub>2</sub> /<br>Ascorbic acid | KHCO <sub>3</sub>     | CO: 10162<br>H <sub>2</sub> : 2875                                    | /         | [S2]         |
| TFBD-COF-Co     | [Ru(bpy) <sub>3</sub> ]Cl <sub>2</sub> /TEOA              | MeCN                  | CO: 360.9                                                             | /         | [S3]         |
| TFBD-COF-Co-SA  | [Ru(bpy) <sub>3</sub> ]Cl <sub>2</sub> /TEOA              | MeCN                  | CO: 1480                                                              | /         | [S3]         |
| Co-COFs         | [Ru(bpy) <sub>3</sub> ]Cl <sub>2</sub> /TEOA              | MeCN/H <sub>2</sub> O | CO: 2375<br>H <sub>2</sub> : 1750                                     | /         | [S4]         |
| Ni-COFs         | [Ru(bpy) <sub>3</sub> ]Cl <sub>2</sub> /TEOA              | MeCN/H <sub>2</sub> O | CO: 5310<br>H <sub>2</sub> : 291                                      | /         | [S4]         |
| Fe-COFs         | [Ru(bpy) <sub>3</sub> ]Cl <sub>2</sub> /TEOA              | MeCN/H <sub>2</sub> O | CO: 1000<br>H <sub>2</sub> : 4815                                     | /         | [S4]         |



|                                            |                                              |                       |                      |       |       |
|--------------------------------------------|----------------------------------------------|-----------------------|----------------------|-------|-------|
| sp <sup>2</sup> c-COF <sub>dpy</sub> -Co   | TEOA                                         | H <sub>2</sub> O      | CO: 1000             | 1.2   | [S5]  |
| DQTP COF-Co                                | [Ru(bpy) <sub>3</sub> ]Cl <sub>2</sub> /TEOA | MeCN                  | CO: 1020             | /     | [S6]  |
| DQTP COF-Zn                                | [Ru(bpy) <sub>3</sub> ]Cl <sub>2</sub> /TEOA | MeCN                  | HCOOH:152.5          | /     | [S6]  |
| ZnFe <sub>2</sub> O <sub>4</sub> /FeP-CTFs | [Ru(bpy) <sub>3</sub> ]Cl <sub>2</sub> /TEOA | MeCN                  | CO: 178              | 0.112 | [S7]  |
| TTCOF-Zn                                   | /                                            | H <sub>2</sub> O      | CO: 2.1              | /     | [S8]  |
| TTCOF-Ni                                   | /                                            | H <sub>2</sub> O      | CO: 1.4              | /     | [S8]  |
| Ni-TpBpy                                   | [Ru(bpy) <sub>3</sub> ]Cl <sub>2</sub> /TEOA | MeCN/H <sub>2</sub> O | CO: 811.4            | 0.3   | [S9]  |
| Ni-PCD@TD-COF                              | [Ru(bpy) <sub>3</sub> ]Cl <sub>2</sub> /TEOA | MeCN/H <sub>2</sub> O | CO: 478              | 0.31  | [S10] |
| PD-COF-23-Ni                               | TEOA                                         | MeCN/H <sub>2</sub> O | CO: 40               | 0.079 | [S11] |
| Ni@PI-COF-TT                               | TEOA                                         | MeCN                  | CO: 483              | 0.55  | [S12] |
| Ni@TPHH-COF                                | [Ru(bpy) <sub>3</sub> ]Cl <sub>2</sub> /TEOA | MeCN/H <sub>2</sub> O | CO: 1270             | /     | [S13] |
| Re-COF                                     | TEOA                                         | MeCN                  | CO: 750              | /     | [S14] |
| Re-Bpy-sp <sup>2</sup> c-COF               | TEOA                                         | MeCN                  | CO: 1040             | 0.5   | [S15] |
|                                            |                                              |                       | H <sub>2</sub> : 244 |       |       |
| Re-CTF-py                                  | TEOA                                         | MeCN                  | CO: 353.05           | /     | [S16] |
| Ru/TpPa-1                                  | TEOA                                         | MeCN                  | HCOOH:108.8          | /     | [S17] |
| Ru@TpBpy                                   | TEOA                                         | MeCN                  | HCOOH: 172           | /     | [S18] |

<sup>a)</sup> Dye is Ir[dF(CF<sub>3</sub>)ppy]<sub>2</sub>(dtbpy))PF<sub>6</sub>.

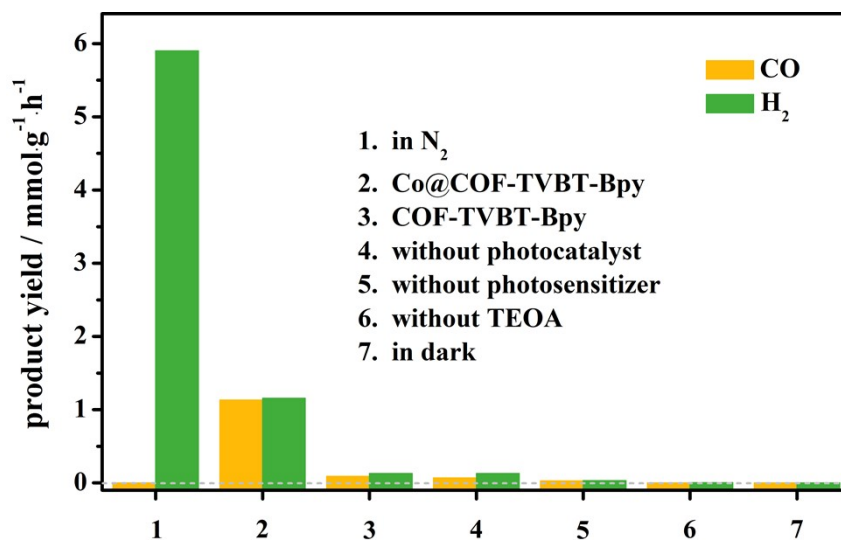

Fig. S13 Photocatalytic CO<sub>2</sub> reduction under various reaction conditions.

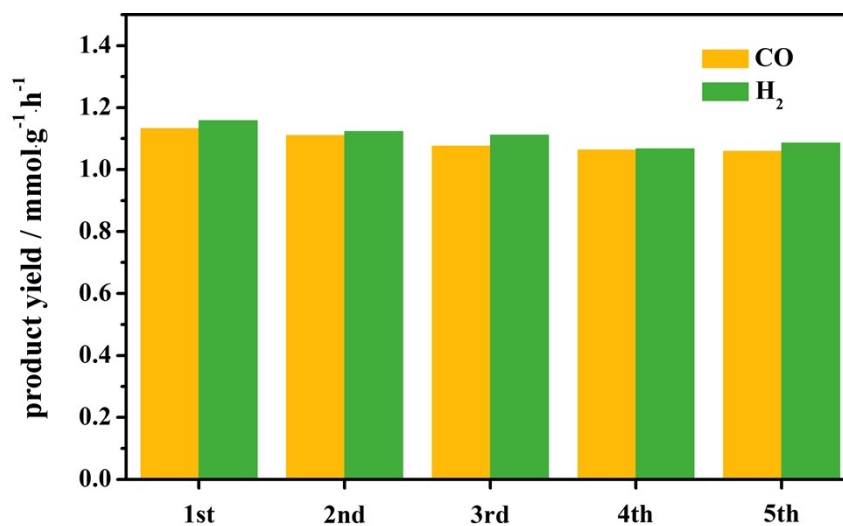

Fig. S14 Reusability test of Co@COF-TVBT-Bpy in photocatalytic reaction.

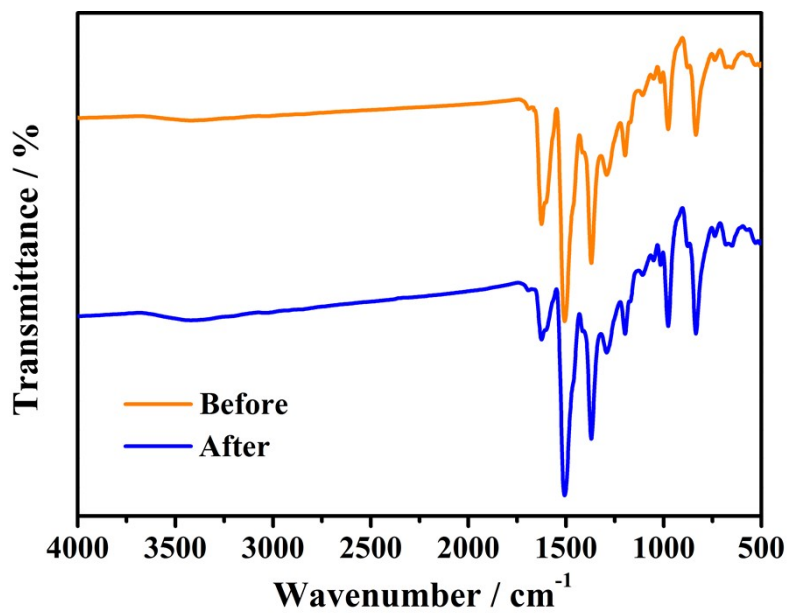

**Fig. S15** FT-IR spectra of Co@COF-TVBT-Bpy before and after photocatalytic cycling reactions.

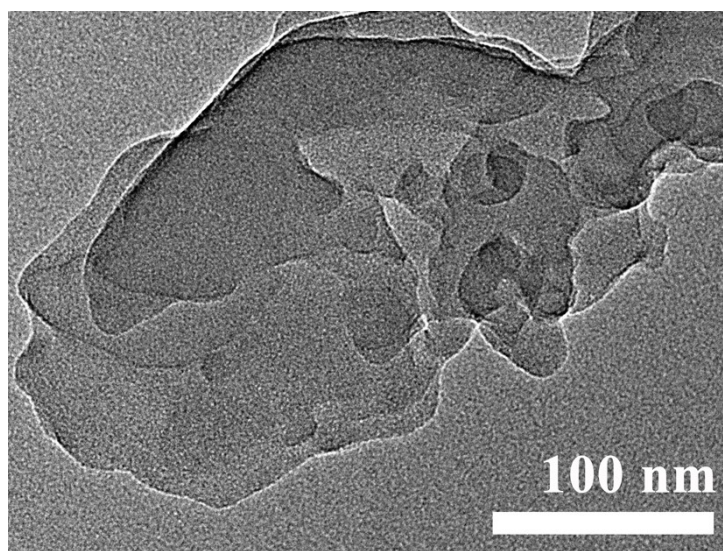

**Fig. S16** TEM image of Co@COF-TVBT-Bpy after photocatalytic cycling reaction.

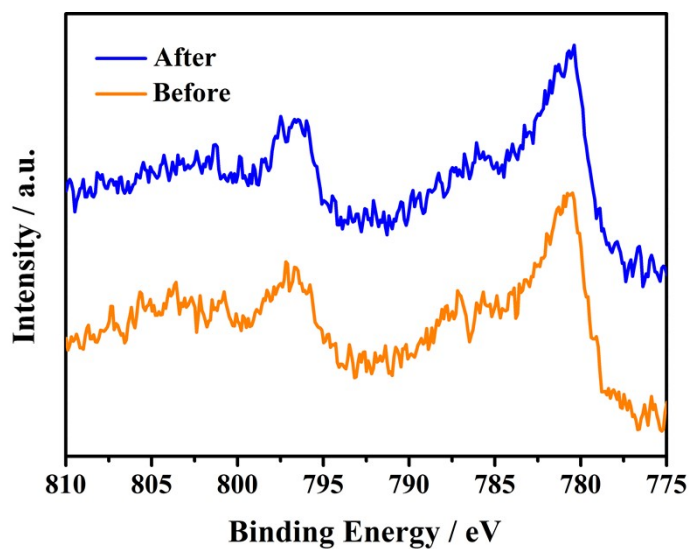

**Fig. S17** The high-resolution XPS spectrum of Co 2p of Co@COF-TVBT-Bpy before and after photocatalytic cycling reactions.

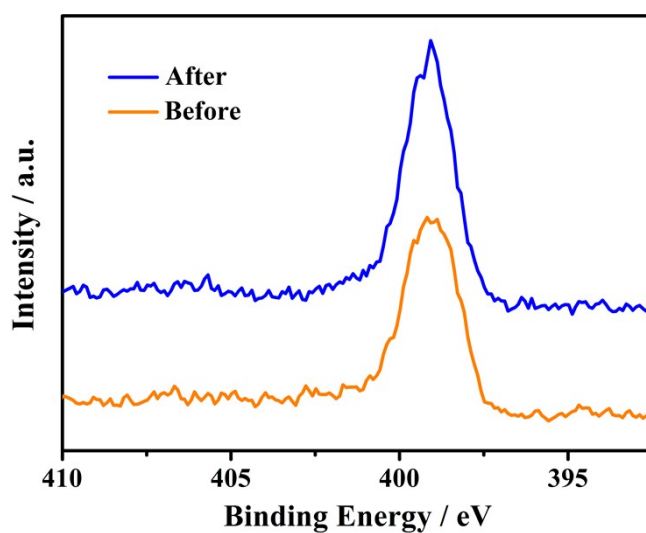

**Fig. S18** The high-resolution XPS spectrum of N 1s of Co@COF-TVBT-Bpy before and after photocatalytic cycling reactions.

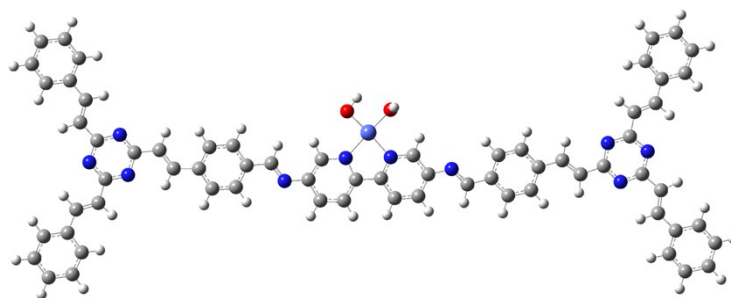

**Fig. S19** Computational model of Co@COF-TVBT-Bpy. Carbon (grey), Hydrogen (white), Nitrogen (dark blue), Cobalt (blue) and Oxygen (red).

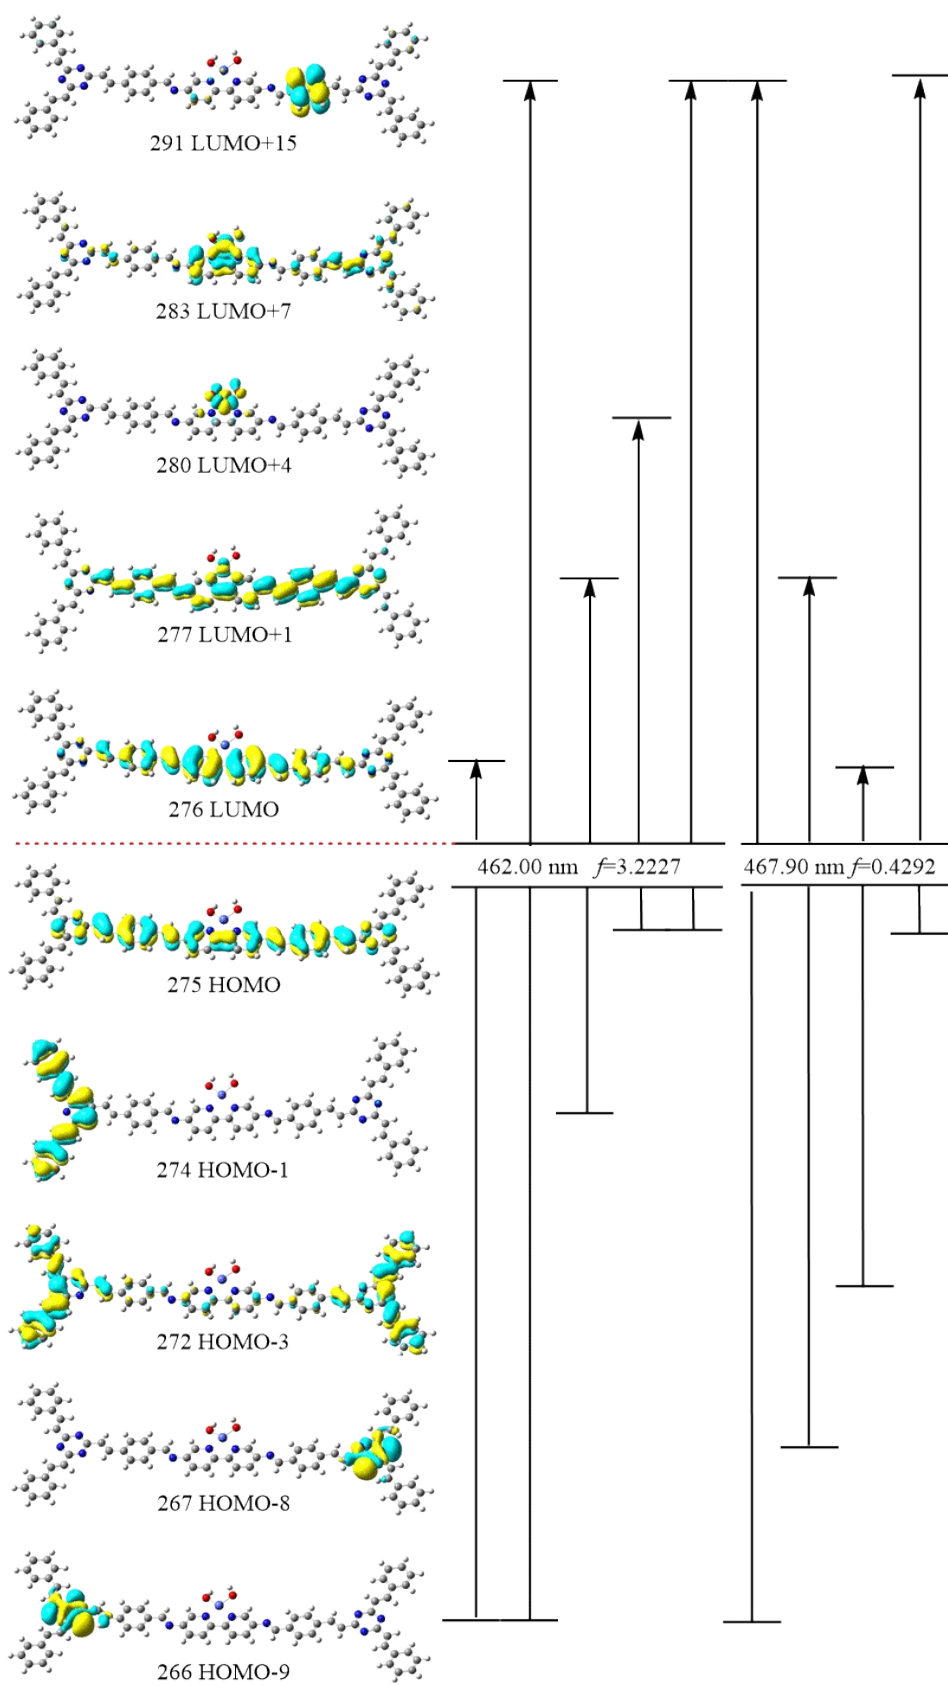

**Fig. S20** Orbital composition analysis image of Co@COF-TVBT-Bpy. Carbon (grey), Hydrogen (white), Nitrogen (dark blue), Cobalt (blue) and Oxygen (red).

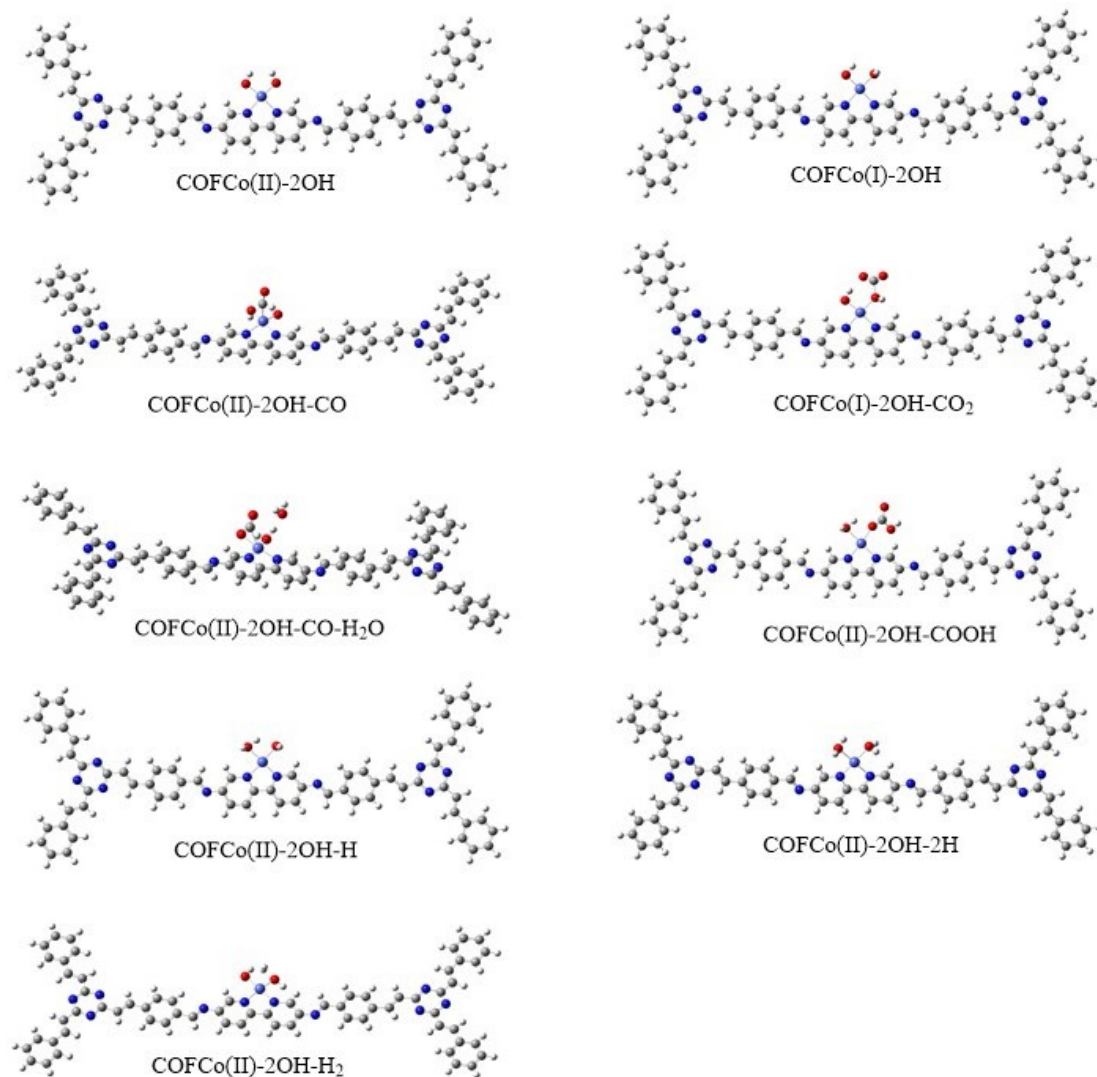

**Fig. S21** Adsorption model diagrams of Co@COF-TVBT-Bpy. Carbon (grey), Hydrogen (white), Nitrogen (dark blue), Cobalt (blue) and Oxygen (red).

**Table S2** The energy of CO formation process.

| Model                                | $\Delta E$ (eV) | $\Delta G$ (eV) |
|--------------------------------------|-----------------|-----------------|
| [Co(II)@COF]                         | 0.000           | 0.000           |
| [Co(I)@COF]                          | 0.152           | 0.164           |
| [Co(I)@COF-CO <sub>2</sub> ]         | -0.200          | 0.005           |
| [Co(II)@COF-COOH]                    | -0.981          | -1.381          |
| [Co(II)@COF-CO-H <sub>2</sub> O]     | -1.358          | -2.306          |
| [Co(II)@COF-CO] + [H <sub>2</sub> O] | -1.240          | -1.887          |

**Table S3** The energy of H<sub>2</sub> formation process.

| Model                        | $\Delta E$ (eV) | $\Delta G$ (eV) |
|------------------------------|-----------------|-----------------|
| [Co(II)@COF]                 | 0.000           | 0.000           |
| [Co(I)@COF]                  | 0.152           | 0.164           |
| [Co(II)@COF-H]               | -0.269          | -0.884          |
| [Co(II)@COF-2H]              | -0.957          | -2.105          |
| [Co(II)@COF-H <sub>2</sub> ] | -1.435          | -2.151          |

## References

- [S1] X. Y. Wang, Z. W. Fu, L. R. Zheng, C. X. Zhao, X. Wang, S. Y. Chong, F. McBride, R. Raval, M. Bilton, L. J. Liu, X. F. Wu, L. J. Chen, R. S. Sprick, A. I. Cooper, *Chem. Mater.*, 2020, **32**, 9107-9114.
- [S2] W. B. Liu, X. K. Li, C. M. Wang, H. H. Pan, W. P. Liu, K. Wang, Q. D. Zeng, R. M. Wang, J. Z. Jiang, *J. Am. Chem. Soc.*, 2019, **141**, 17431-17440.
- [S3] Y. Yang, Y. Lu, H. Y. Zhang, Y. Wang, H. L. Tang, X. J. Sun, G. L. Zhang, F. M. Zhang, *ACS Sustainable Chem. Eng.*, 2021, **9**, 13376-13384.
- [S4] B. Han, X. W. Ou, Z. Q. Zhong, S. J. Liang, H. Deng, Z. Lin, *Small*, 2020, **16**, 2002985.
- [S5] Y. G. Xiang, W. B. Dong, P. Wang, S. Y. Wang, X. Ding, F. Ichihara, Z. Wang, Y. Wada, S. B. Jin, Y. X. Weng, H. Chen, J. H. Ye, *Appl. Catal., B*, 2020, **274**, 119096.
- [S6] M. Lu, Q. Li, J. Liu, F. M. Zhang, L. Zhang, J. L. Wang, Z. H. Kang, Y. Q. Lan, *Appl. Catal., B*, 2019, **254**, 624-633.
- [S7] Y. L. Yan, Q. J. Fang, J. K. Pan, J. Yang, L. L. Zhang, W. Zhang, G. L. Zhuang, X. Zhong, S. W. Deng, J. G. Wang, *Chem. Eng. J.*, 2021, **408**, 127358.
- [S8] M. Lu, J. Liu, Q. Li, M. Zhang, M. Liu, J. L. Wang, D. Q. Yuan, Y. Q. Lan, *Angew. Chem., Int. Ed.*, 2019, **58**, 12392-12397.
- [S9] W. F. Zhong, R. J. Sa, L. Y. Li, Y. J. He, L. Y. Li, J. H. Bi, Z. Y. Zhuang, Y. Yu, Z. G. Zou, *J. Am. Chem. Soc.*, 2019, **141**, 7615-7621.
- [S10] H. Zhong, R. J. Sa, H. W. Lv, S. L. Yang, D. Q. Yuan, X. C. Wang, R. H.



- Wang, *Adv. Funct. Mater.*, 2020, **30**, 2002654.
- [S11] N. F. Xu, Y. X. Diao, X. H. Qin, Z. T. Xu, H. Z. Ke, X. J. Zhu, *Dalton Trans.*, 2020, **49**, 15587-15591.
- [S12] X. Chen, Q. Dang, R. J. Sa, L. Y. Li, L. Y. Li, J. H. Bi, Z. Z. Zhang, J. L. Long, Y. Yu, Z. G. Zou, *Chem. Sci.*, 2020, **11**, 6915-6922.
- [S13] M. Dong, J. Zhou, J. Zhong, H. T. Li, C. Y. Sun, Y. D. Han, J. N. Kou, Z. H. Kang, X. L. Wang, Z. M. Su, *Adv. Funct. Mater.*, 2022, **32**, 2110136.
- [S14] S. Z. Yang, W. H. Hu, X. Zhang, P. L. He, B. Pattengale, C. M. Liu, M. Cendejas, I. Hermans, X. Y. Zhang, J. Zhang, J. Huang, *J. Am. Chem. Soc.*, 2018, **140**, 14614-14618.
- [S15] Z. W. Fu, X. Y. Wang, A. M. Gardner, X. Wang, S. Y. Chong, G. Neri, A. J. Cowan, L. J. Liu, X. B. Li, A. Vogel, R. Clowes, M. Bilton, L. J. Chen, R. S. Sprick, A. I. Cooper, *Chem. Sci.*, 2020, **11**, 543-550.
- [S16] R. Xu, X. S. Wang, H. Zhao, H. Lin, Y. B. Huang, R. Cao, *Catal. Sci. Technol.*, 2018, **8**, 2224-2230.
- [S17] K. Guo, X. L. Zhu, L. L. Peng, Y. H. Fu, R. Ma, X. Q. Lu, F. M. Zhang, W. D. Zhu, M. H. Fan, *Chem. Eng. J.*, 2021, **405**, 127011.
- [S18] Z. L. Liu, Y. Q. Huang, S. Q. Chang, X. L. Zhu, Y. H. Fu, R. Ma, X. Q. Lu, F. M. Zhang, W. D. Zhu, M. H. Fan, *Sustainable Energy Fuels*, 2021, **5**, 2871-2876.
